# Supplementary material
Source: HighWire-hosted journal article supplement (https://heart.bmj.com/content/106/6/467)
Supplement: inline-supplementary-material-1 [file inline-supplementary-material-1.pdf]

## **Growth Differentiation Factor-15 as candidate predictor for mortality in adults with pulmonary hypertension**

### **Authors:**

Laurie W. Geenen, BSc, Vivan J.M. Baggen, MD, PhD, Robert M. Kauling, MD, Thomas Koudstaal, MD, Karin A. Boomars, MD, PhD, Eric Boersma, MD, PhD, Jolien W. Roos-Hesselink, MD, PhD, Annemien E. van den Bosch, MD, PhD

### **SUPPLEMENTARY MATERIAL**

| <b>List of files</b>                                                                                                                               | <b>Page</b> |
|----------------------------------------------------------------------------------------------------------------------------------------------------|-------------|
| <b>Supplementary File 1.</b> Reproducibility of GDF-15 assay in healthy volunteers.....                                                            | 1           |
| <b>Supplementary File 2.</b> Levels of GDF-15 in healthy volunteers stratified according to age decades and sex .....                              | 2           |
| <b>Supplementary File 3.</b> Flowchart of the patient selection process.....                                                                       | 3           |
| <b>Supplementary File 4.</b> Scatterplot showing GDF-15 measurements according to each subgroup of adults with pulmonary hypertension.....         | 4           |
| <b>Supplementary File 5.</b> Detailed list of death causes in 30 adults with pulmonary hypertension.....                                           | 5           |
| <b>Supplementary File 6.</b> Association between GDF-15 and the primary and secondary endpoint restricted to PAH patients (subgroup analysis)..... | 6           |

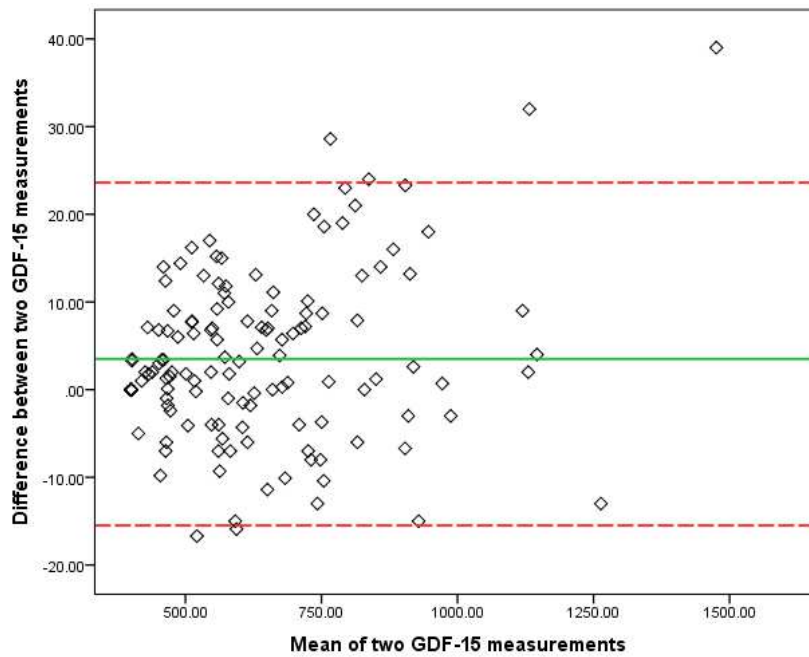

**Supplementary File 1.** Reproducibility of GDF-15 assay in healthy volunteers shown by a Bland-Altman plot.

**Legend:** The green line corresponds with the mean difference between two GDF-15 measurements. The red dotted-lines correspond to the corresponding limits of agreement ( $\pm 1.96$  SD). The coefficient of variation was 0.68%.

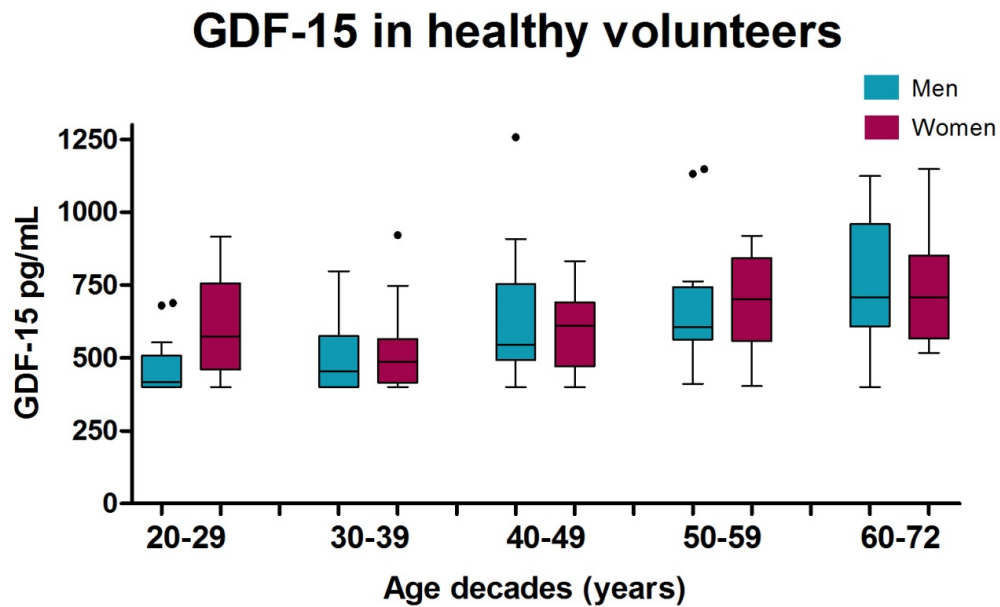

**Supplementary File 2.** Levels of GDF-15 in healthy volunteers stratified according to sex and age decades. Each age decade is approximately equally represented by the number of healthy volunteers.

**Legend:** boxplots showing the median and interquartile ranges. Spread of the data is shown by the whiskers (Turkey boxplot). Outliers are plotted with a dot. The lowest limit of detection of the GDF-15 assay was 400 pg/mL.

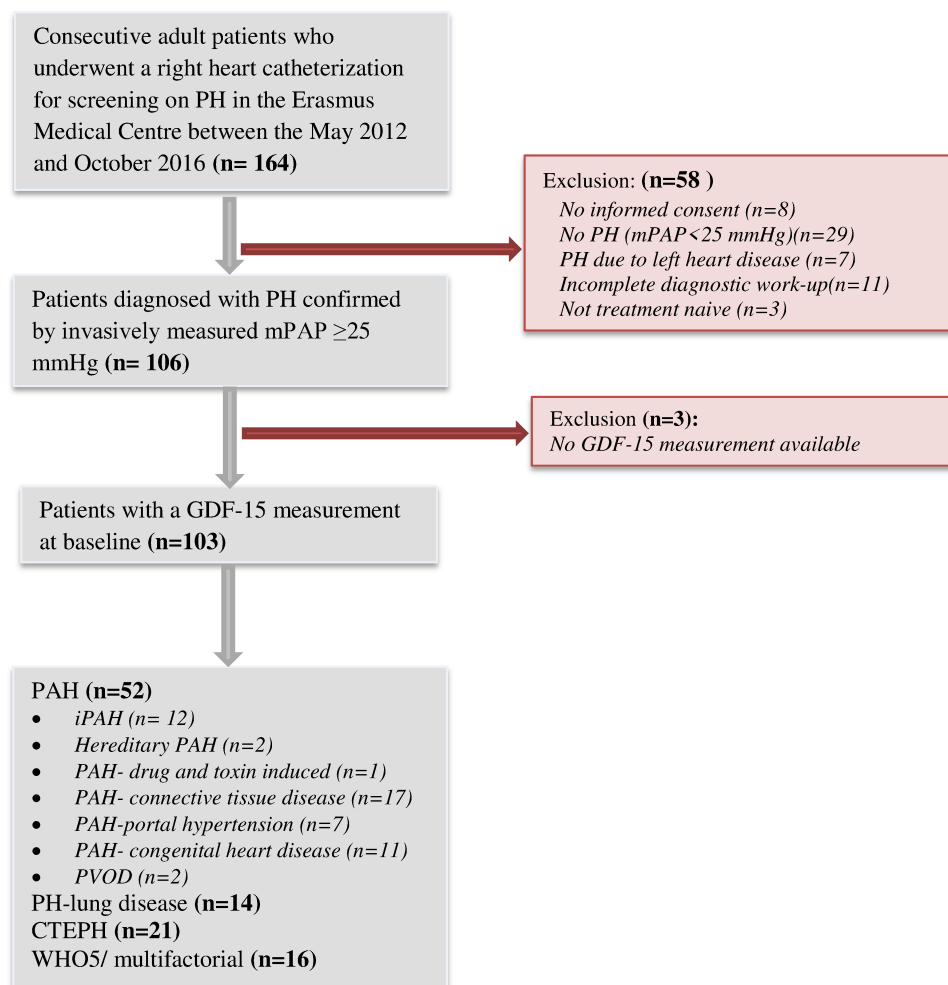

**Supplementary File 3.** Flowchart of the patient selection process of the study cohort.

**Abbreviations:** PH= pulmonary hypertension, mPAP= mean pulmonary arterial pressure, GDF-15= growth differentiation factor-15, PAH= pulmonary arterial hypertension, iPAH= idiopathic pulmonary arterial hypertension, PVOD= pulmonary veno-occlusive disease, CTEPH= chronic thromboembolic pulmonary hypertension, WHO5= World Health Organization group 5.

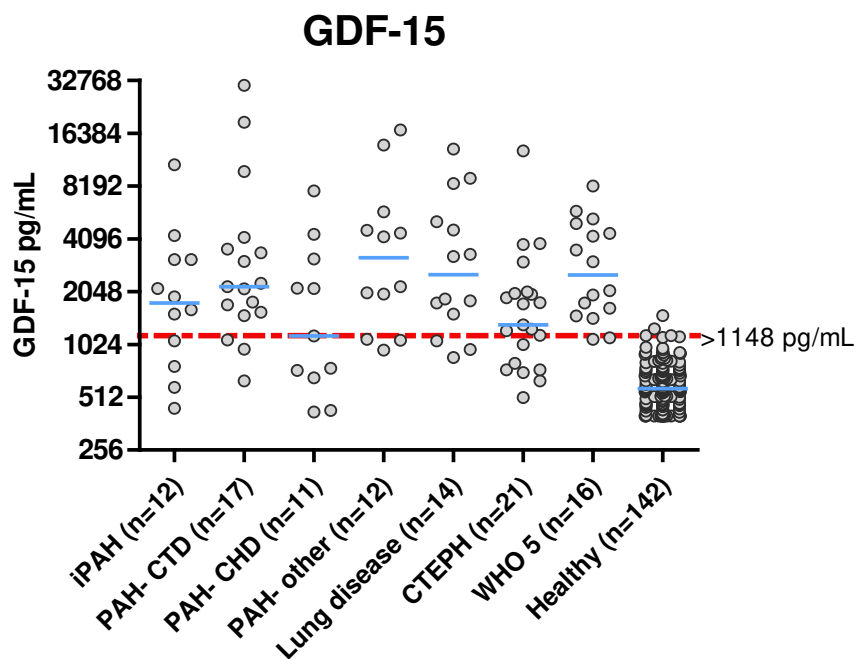

**Figure 4.** Measurements of GDF-15 in pg/mL according to subgroups in pulmonary hypertension patients and GDF-15 measurements performed in healthy volunteers.

**Figure legend:** Y-axis is on the 2-log scale. The red line indicates the 97<sup>th</sup> percentile level of GDF-15 based on measurements in healthy volunteers. The black line indicates the median GDF-15 level in each subgroup.

PAH-other consisted of; pulmonary veno-occlusive disease(n=2), PAH- associated with portal hypertension (n=7), hereditary PAH (n=2), drug and toxin induced PAH (n=1).

**Abbreviations:** iPAH= idiopathic pulmonary arterial hypertension, PAH-CTD = pulmonary arterial hypertension due to connective tissue disease, PAH-CHD= pulmonary arterial hypertension due to congenital heart disease,

| <b>Cause of death</b>                              | <b>Number of cases (%)</b> |
|----------------------------------------------------|----------------------------|
| End-stage heart failure                            | 9 (30.0)                   |
| Sudden death presumed cardiac                      | 4 (13.3)                   |
| Euthanasia*                                        | 3 (10.0)                   |
| Multi-organ failure                                | 3 (10.0)                   |
| Kidney/liver failure                               | 2 (6.7)                    |
| Malignancy                                         | 1 (3.3)                    |
| Myocardial infarction                              | 1 (3.3)                    |
| Hepatic encephalopathy                             | 1 (3.3)                    |
| Progression of systemic sclerosis                  | 1 (3.3)                    |
| Sudden death, presumed cerebral                    | 1 (3.3)                    |
| End stage lung fibrosis and PH due to polymyositis | 1 (3.3)                    |
| Occlusion of femoral artery                        | 1 (3.3)                    |
| Post lung transplantation                          | 1 (3.3)                    |
| Unknown                                            | 1 (3.3)                    |

**Supplementary File 5.** Detailed list of death causes in 30 adults with pulmonary hypertension.

*\*In patients with end-stage cardiovascular and pulmonary disease.*

| Pulmonary arterial hypertension( PAH) |                         |         |                           |         |
|---------------------------------------|-------------------------|---------|---------------------------|---------|
|                                       | Primary endpoint (n=16) |         | Secondary endpoint (n=20) |         |
|                                       | HR*(95%CI)              | p-value | HR*(95%CI)                | p-value |
| GDF-15<br>(univariable)               | 1.57 (1.14-2.15)        | 0.005   | 1.50 (1.13-1.97)          | 0.004   |
| <i>Adjusted for:</i>                  |                         |         |                           |         |
| Age                                   | 1.44 (1.02-2.02)        | 0.038   | 1.35 (1.00-1.82)          | 0.052   |
| Sex                                   | 1.57 (1.15-2.15)        | 0.005   | 1.49 (1.13-1.97)          | 0.004   |
| NYHA class 3/4                        | 1.50 (1.10-2.06)        | 0.012   | 1.41 (1.08-1.86)          | 0.013   |
| 6-MWD                                 | 1.38 (1.01-1.90)        | 0.046   | 1.21 (0.91-1.61)          | 0.183   |
| Right atrial area                     | 1.48 (1.09-2.02)        | 0.012   | 1.49 (1.10-1.90)          | 0.008   |
| Cardiac index                         | 1.61 (1.16-2.25)        | 0.005   | 1.56 (1.34-1.81)          | 0.003   |
| mRAP                                  | 1.71 (1.24-2.34)        | <0.001  | 1.55 (1.17-2.05)          | 0.002   |
| eGFR                                  | 1.37 (0.92-2.04)        | 0.117   | 1.27 (0.90-1.80)          | 0.178   |
| NT-proBNP                             | 1.55 (1.07-2.25)        | 0.020   | 1.43 (1.03-1.99)          | 0.031   |

**Supplementary File 6.** Association between GDF-15 and the primary and secondary endpoint restricted to only adults with pulmonary arterial hypertension

**Legend:** \*HR per two-fold higher value of GDF-15.

**Abbreviations:** HR= hazard ratio, GDF-15= growth differentiation factor-15, NYHA= New York Heart Association, mPAP= mean pulmonary arterial pressure, mRAP= mean right atrial pressure, eGFR= estimated glomerular filtration rate, NT-proBNP= N-terminal pro B-type natriuretic peptide
